# Supplementary material for: Biomarkers of meat and seafood intake: an extensive literature review
Source: PubMed Central journal article supplement (PMC6937850; doi:10.1186/s12263-019-0656-4), 2019-12-30
Supplement: 12263_2019_656_MOESM3_ESM.pdf [file 12263_2019_656_MOESM3_ESM.pdf]

**Table S4. Summary of the selected candidate biomarkers of meat and seafood intake and the discarded markers. For each marker, a brief explanation for inclusion or exclusion from the list of candidate FIBs is reported**

| <b>Food item</b>  | <b>Metabolites</b>                          | <b>Biofluid Locations</b> | <b>Reason for inclusion or exclusion from the list of candidates FIBs</b>                                                                                                                                                                  | <b>Selected for the systematic validation as FIB</b> |
|-------------------|---------------------------------------------|---------------------------|--------------------------------------------------------------------------------------------------------------------------------------------------------------------------------------------------------------------------------------------|------------------------------------------------------|
| <b>Meat (all)</b> | $\delta^{15}\text{N} + \delta^{13}\text{C}$ | Faeces                    | Candidate biomarker to assess recent intake of meat in populations with limited dairy and egg intakes. It has to be validated for each specific populations, as it is affected by other sources of animal proteins.                        | Yes                                                  |
|                   | $\delta^{15}\text{N} + \delta^{13}\text{C}$ | Urine                     | Candidate biomarker to assess recent intake of meat. It has to be validated for each specific population, as it is affected by other sources of animal proteins.                                                                           | Yes                                                  |
|                   | $\delta^{15}\text{N}$                       | Plasma/Serum              | Candidate biomarker to assess the habitual intake of meat. It has to be validated for each specific population, as it is affected by other sources of animal proteins.                                                                     | Yes                                                  |
|                   | $\delta^{15}\text{N} + \delta^{13}\text{C}$ | Hair                      | Candidate biomarker to assess the habitual intake of meat. It has to be validated for each specific population, as it is affected by other sources of animal proteins.                                                                     | Yes                                                  |
|                   | Anserine                                    | Urine                     | Candidate marker of recent intake of meat. Levels are much higher in chicken and certain kinds of fish (salmon and tuna)                                                                                                                   | Yes                                                  |
|                   | Anserine                                    | Plasma                    | Insufficient data for validation.                                                                                                                                                                                                          | No                                                   |
|                   | 3-Methylhistidine                           | Urine                     | Candidate marker to assess recent meat intake, particularly chicken, but also certain kinds of fish. Due to differences in 3-MH content in different animals, it needs to be validated for each study population for quantitative purpose. | Yes                                                  |
|                   | 3-Methylhistidine                           | Plasma                    | Candidate marker to assess the consumption of meat proteins, especially for chicken or for poultry in general.                                                                                                                             | Yes                                                  |
|                   | 1-Methylhistidine                           | Urine                     | Endogenous compound originating from muscle protein breakdown. High background level and inter-individual variation. May be used as part of combined markers.                                                                              | No                                                   |
|                   | 1-Methylhistidine                           | Plasma                    | Insufficient data for validation.                                                                                                                                                                                                          | No                                                   |
|                   | $\beta$ -alanine                            | Plasma                    | Endogenous metabolite. Not specific enough to assess meat protein intake.                                                                                                                                                                  | No                                                   |
|                   | Carnitine and acylcarnitines.               | Urine and serum           | Endogenous metabolites increasing after meat intake. Other physiological conditions may affect the ability of these compounds to quantitatively estimate meat intake.                                                                      | No                                                   |
|                   | Creatine                                    | Urine                     | Present in muscle, including human resulting in some background. Candidate marker for short-term and habitual intake of meat and seafood. May be used as part of combined markers.                                                         | Yes                                                  |

|                   |                                                   |        |                                                                                                                                                                                                                                                                                   |     |
|-------------------|---------------------------------------------------|--------|-----------------------------------------------------------------------------------------------------------------------------------------------------------------------------------------------------------------------------------------------------------------------------------|-----|
|                   | Creatine                                          | Blood  | Present in muscle, including human. Putative marker for habitual intake of meat.                                                                                                                                                                                                  | Yes |
|                   | Creatinine                                        | Urine  | Endogenous metabolite. Excretion into urine is highly depending on kidney function. Not suitable as FIB.                                                                                                                                                                          | No  |
|                   | Carnosine                                         | Urine  | Candidate marker to assess recent meat intake. Differences in the contents in different meats may preclude the use this marker for quantitative total meat intake assessment in individuals.                                                                                      | Yes |
|                   | Carnosine                                         | Plasma | Discrepancies between studies. Further investigation is needed.                                                                                                                                                                                                                   | No  |
|                   | 1-methylhistidine + 3-methylhistidine + carnosine | Urine  | Combination of marker to predict a meat-based diet against lacto-ovo vegetarian diet in a controlled setting. Better prediction than single markers. Need for further validation.                                                                                                 | Yes |
|                   | Taurine                                           |        | Originating from endogenous formation and from intake of animal tissues. Discrepancies between studies. Not robust enough to be used as FIB.                                                                                                                                      | No  |
|                   | Trans-4-hydroxyproline                            | Plasma | Present in connective tissues. Putative marker to estimate the overall intake of meat. Further studies are needed to evaluate the specificity of the marker in case of fish intake.                                                                                               | Yes |
|                   | Agmatine                                          | Plasma | Potentially increased with meat. Agmatine is an intermediate metabolite in arginine catabolism and a neuroactive effector. As such it cannot serve as an intake biomarker but possibly as an effect marker.                                                                       | No  |
|                   | TMAO                                              | Plasma | Depending on microbial and host characteristics.                                                                                                                                                                                                                                  | No  |
| <b>Red meat</b>   | Ferritin                                          | Serum  | Contradictory results exist about the relationship between red meat intake and serum ferritin. More investigation is needed to investigate dose-response relationships between serum ferritin and red meat consumption.                                                           | No  |
|                   | ATNCs                                             | Urine  | Positive association between heme iron content and increasing doses of red meat. Possibly an artifact of analysis. Need for better validation studies.                                                                                                                            | No  |
|                   | DHN-MA                                            | Urine  | Positive association with heme iron content and/or increasing doses of red meat. Probably unspecific. Need for better validation studies.                                                                                                                                         | No  |
| <b>Offal meat</b> | 8-iso-PGF2A                                       | Urine  | Not specific as meat intake biomarker.                                                                                                                                                                                                                                            | No  |
|                   | DHN-MA                                            | Urine  | Not specific to offal meats                                                                                                                                                                                                                                                       | No  |
| <b>Poultry</b>    | Anserine                                          | Urine  | Candidate marker of recent intake of poultry but also found after intake of certain kinds of fish (salmon and tuna). Due to differences in anserine content in different meats, its use for intake assessment of poultry in individual needs to be validated for each population. | Yes |

|                                      |                                                       |                                                                                                                                                                |                                                                                                                                                                                                    |     |
|--------------------------------------|-------------------------------------------------------|----------------------------------------------------------------------------------------------------------------------------------------------------------------|----------------------------------------------------------------------------------------------------------------------------------------------------------------------------------------------------|-----|
| <b>Heated meat and seafood</b>       | 3-MH                                                  | Urine                                                                                                                                                          | Candidate marker of poultry intake but present also after some other meats; its use is therefore dependent on other meat intakes.                                                                  | Yes |
|                                      | Guanidinoacetate                                      | Urine                                                                                                                                                          | Candidate biomarkers of chicken intake. Needs further validation for other poultry including those not fed with the compound.                                                                      | Yes |
|                                      | MeIQ <sub>x</sub> (free)                              | Urine                                                                                                                                                          | Not detected                                                                                                                                                                                       | No  |
|                                      | PhIP (free)                                           | Urine                                                                                                                                                          | High inter-individual variability.                                                                                                                                                                 | No  |
|                                      | PhIP (free)                                           | Faeces                                                                                                                                                         | High inter-individual variability. No dose-response relationship.                                                                                                                                  | No  |
|                                      | PhIP (free)                                           | Hair                                                                                                                                                           | Candidate markers of habitual consumption of fried and roasted meat. Need for validation in observational studies.                                                                                 | Yes |
|                                      | MeIQ <sub>x</sub> (total, after enzymatic hydrolysis) | Urine                                                                                                                                                          | Candidate marker to assess short-term intake of fried or grilled meat and seafood. High inter-individual variability. Additional studies are needed to validate the marker in real-life exposures. | Yes |
|                                      | PhIP (total, after enzymatic hydrolysis)              | Urine                                                                                                                                                          | Candidate marker to assess short-term intake of fried or grilled meat and seafood. High inter-individual variability. Additional studies are needed to validate the marker in real-life exposure.  | Yes |
|                                      | MeIQ <sub>x</sub> metabolites                         | Urine                                                                                                                                                          | Too high inter-individual variability                                                                                                                                                              | No  |
|                                      | PhIP metabolites                                      | Urine                                                                                                                                                          | Too high inter-individual variability                                                                                                                                                              | No  |
|                                      | 4'-OH-PhIP                                            | Urine                                                                                                                                                          | Candidate marker to assess the exposure to roasted meat                                                                                                                                            | Yes |
|                                      | 5-OH-PhIP                                             | Urine                                                                                                                                                          | Marker of activation of PhIP. Not suitable as FIB for heated meat intake.                                                                                                                          | No  |
|                                      | Other HAAs                                            | Urine/ plasma                                                                                                                                                  | Too high inter-individual variability                                                                                                                                                              | No  |
|                                      | PhIP-M1                                               | Faeces                                                                                                                                                         | Too high inter-individual variability                                                                                                                                                              | No  |
| PAHs                                 | Urine                                                 | Not specific enough to assess the intake of grilled, broiled or roasted meat in real life exposure due to confounders (e.g. cigarette smoking, air pollution). | No                                                                                                                                                                                                 |     |
| <b>Processed meat</b>                | Membrane lipids.                                      | Plasma/serum                                                                                                                                                   | Not specific for use as biomarker                                                                                                                                                                  | No  |
|                                      | Nitrosoproline                                        | Plasma                                                                                                                                                         | Not specific for use as biomarker                                                                                                                                                                  | No  |
| <b>Marine fish and other seafood</b> | $\delta^{15}N + \delta^{13}C$                         | Plasma                                                                                                                                                         | Candidate biomarker to assess the habitual intake of fish, only evaluated in observational studies.                                                                                                | No  |
|                                      | EPA (total)                                           | Blood                                                                                                                                                          | Candidate intake biomarker for marine fats                                                                                                                                                         | Yes |
|                                      | DHA (total)                                           | Blood                                                                                                                                                          | Candidate intake biomarker for marine fats                                                                                                                                                         | Yes |
|                                      | EPA free                                              | plasma/serum                                                                                                                                                   | Candidate shorter-term intake biomarker for marine fats                                                                                                                                            | Yes |
|                                      | DHA free                                              | plasma/serum                                                                                                                                                   | Candidate shorter-term intake biomarker for marine fats                                                                                                                                            | Yes |
|                                      | EPA esterified                                        | Plasma PCs                                                                                                                                                     | Candidate shorter-term intake biomarker for marine fats                                                                                                                                            | Yes |

|                          |                      |                                                                                                                                                       |     |
|--------------------------|----------------------|-------------------------------------------------------------------------------------------------------------------------------------------------------|-----|
| DHA esterified           | Plasma PCs           | Candidate shorter-term intake biomarker for marine fats.                                                                                              | Yes |
| EPA                      | RBC membranes        | Candidate long-term intake biomarker for marine fats                                                                                                  | Yes |
| DHA                      | RBC membranes        | Candidate long-term intake biomarker for marine fats                                                                                                  | Yes |
| EPA/AA                   | Plasma phospholipids | Putative marker to differentiate fish intake from meat intake in controlled settings only.                                                            | Yes |
| n-6/n-3 LCPUFAs          | Plasma               | Putative marker to differentiate fish intake from meat intake in controlled settings only.                                                            | Yes |
| CMPF                     | Urine                | Candidate marker to assess habitual fatty fish intake in free living populations.                                                                     | Yes |
| CMPF                     | Plasma               | Candidate marker to assess habitual fatty fish intake in free living populations                                                                      | Yes |
| TMAO                     | Urine                | Candidate marker to assess recent fish intake with high sensitivity.                                                                                  | Yes |
| THCC                     | Plasma/urine         | Not specific for use as biomarker                                                                                                                     | No  |
| Phosphatidylethanolamine | Plasma               | Not specific for use as biomarker                                                                                                                     | No  |
| Cetoleic acid            | Plasma               | Not specific for use as biomarker                                                                                                                     | No  |
| Astaxanthin              | Plasma               | Candidate biomarker of salmon and red seafood intake                                                                                                  | Yes |
| Arsenobetaine            | Urine                | Candidate biomarker to assess habitual or recent intake of seafood. May be affected by geographical and individual factors. Needs further validation. | Yes |
| Arsenobetaine            | Plasma               | Candidate biomarker to assess short-term intake of seafood. May be affected by geographical and individual factors. Needs further validation.         | Yes |
